# Supplementary material for: Data-driven network alignment
Source: PLOS journal article supplement (doi:10.1371/journal.pone.0234978), 2020-07-02
Supplement: S1 (10.1371/journal.pone.0234978.s001) [file journal.pone.0234978.s001]

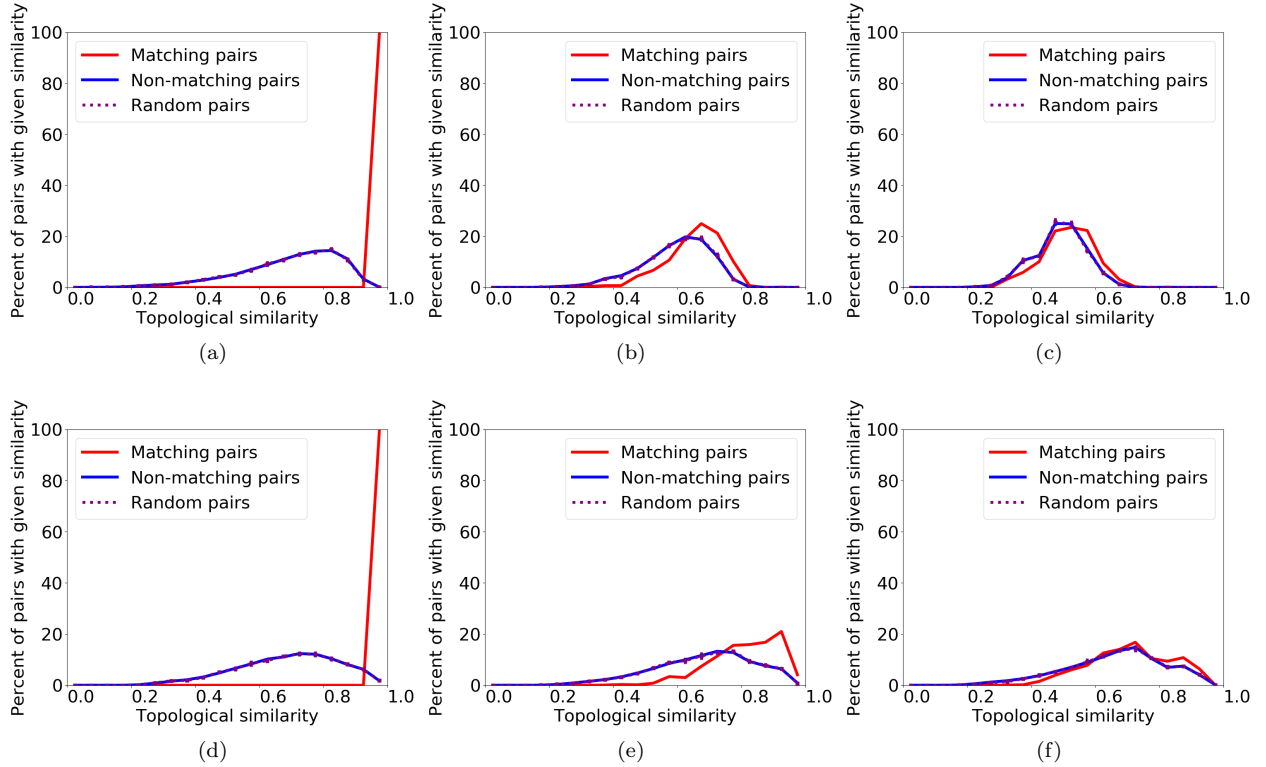

Supplementary Figure S1: Distribution of topological similarity (GDV-similarity) between node pairs of a (a,b,c) geometric and (d,e,f) scale-free network and their (a,d) 0%, (b,e) 25% noisy, and (c,f) 50% noisy counterparts. We show three lines representing the distribution of topological similarity for matching, i.e., functionally related, node pairs (blue), for non-matching, i.e., functionally unrelated, node pairs (red), and for 10 random samples of the same size as the set of matching pairs, averaged (purple).
