# Supplementary material for: Data-driven network alignment
Source: PLOS journal article supplement (doi:10.1371/journal.pone.0234978), 2020-07-02
Supplement: S4 (10.1371/journal.pone.0234978.s004) [file journal.pone.0234978.s004]

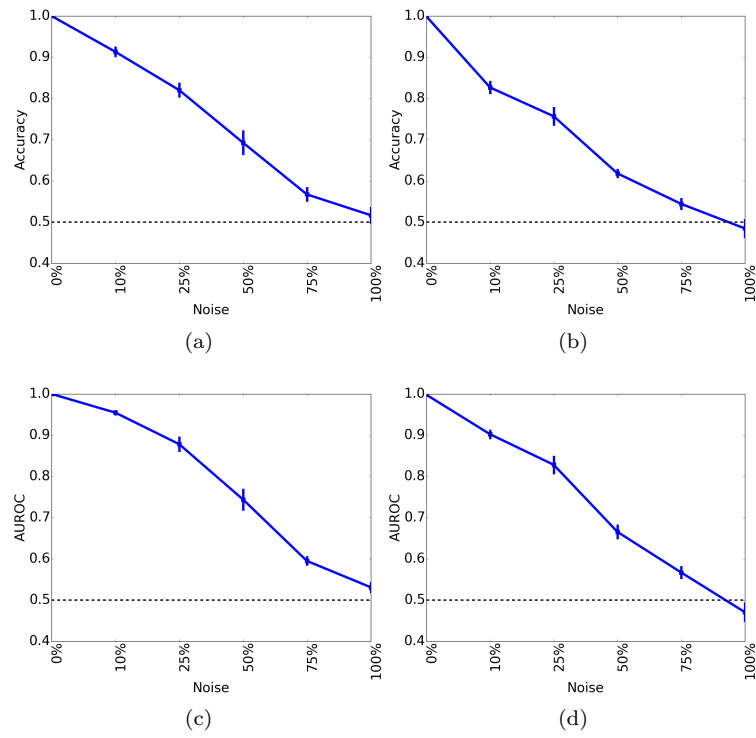

Supplementary Figure S4: Average **(a,b)** prediction accuracy and **(c,d)** AUROC of 10-fold cross validation for **(a,c)** geometric and **(b,d)** scale-free networks.
